# Supplementary material for: Ultra-rapid detection of nuclear protein of severe fever with thrombocytopenia syndrome virus by colloidal gold immunochromatography assay
Source: PeerJ journal article supplement (doi:10.7717/peerj.18275), 2024-10-14
Supplement: supplementary_files_1.pdf [file supplementary_files_1.pdf]

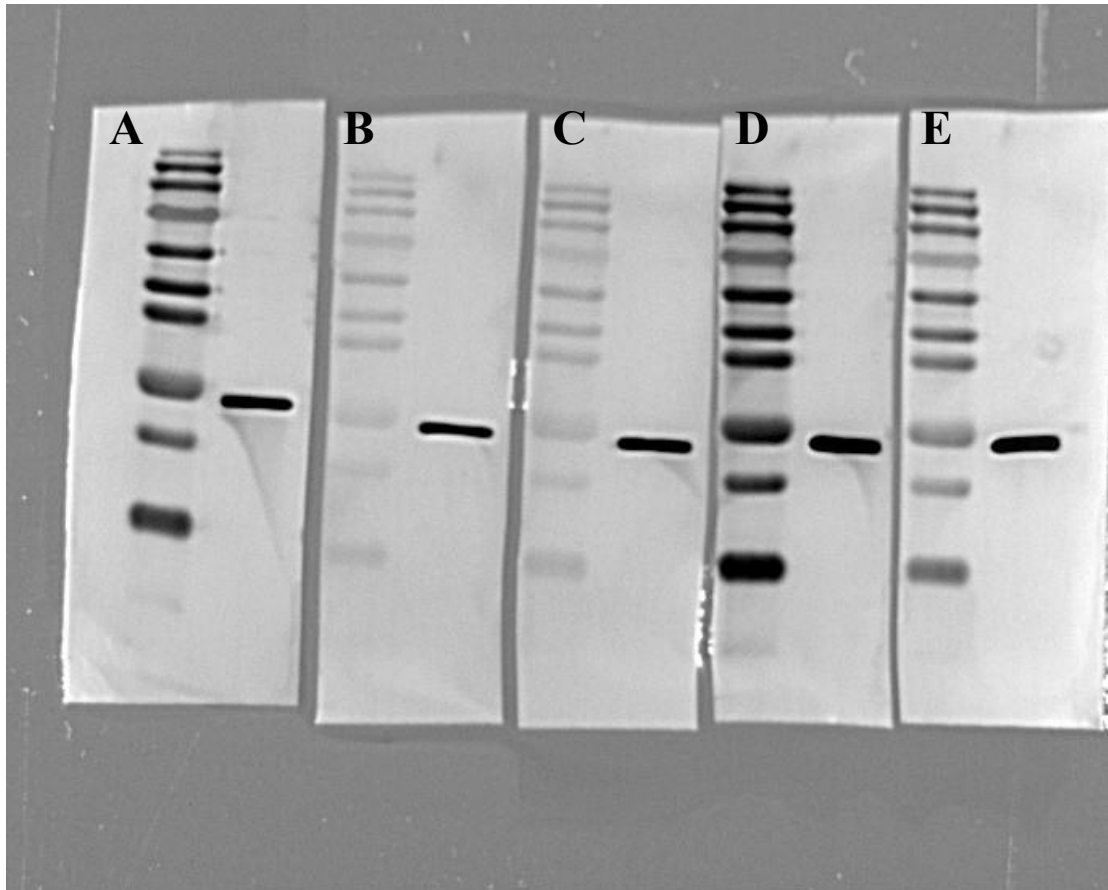

1  
2 Figure S1: Original Western Blot image of monoclonal antibody against SFTSV-NP protein. (A)  
3 The Western Blot image of SV01-13; (E) The Western Blot image of SV06-21.

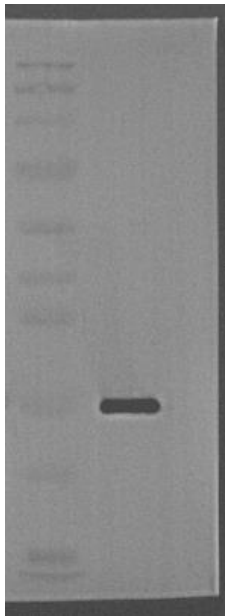

4  
5 Figure S2: Original Western Blot image of Recombinant SFTSV-NP protein.
